# Supplementary material for: Pandemic trends in health care use: From the hospital bed to self-care with COVID-19
Source: PLOS journal article supplement (doi:10.1371/journal.pone.0265812), 2022-03-23
Supplement: S2 (10.1371/journal.pone.0265812.s002) [file journal.pone.0265812.s002]

A. Men, 1-19

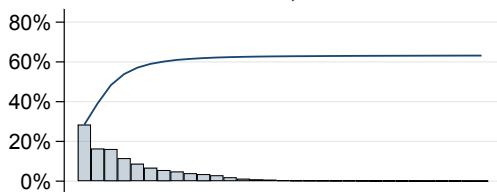

B. Women, 1-19

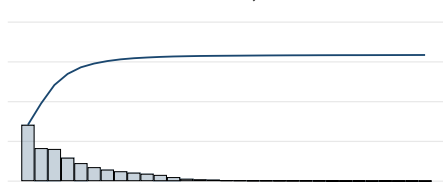

C. Men, 20-67

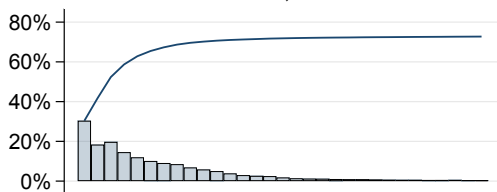

D. Women, 20-67

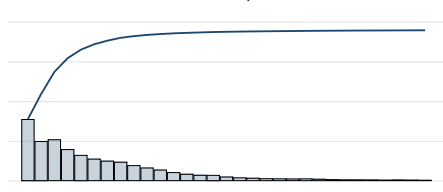

E. Men, 68+

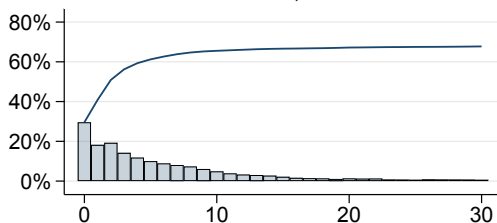

F. Women, 68+

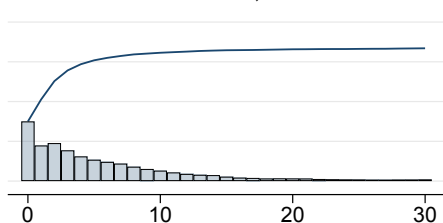

Days since index date

— Share visiting outpatient care at least once since index date  
■ Share visiting outpatient care on respective day
